# Supplementary material for: RORγt agonist enhances anti-PD-1 therapy by promoting monocyte-derived dendritic cells through CXCL10 in cancers
Source: Springer Nature journal article supplement (doi:10.1186/s13046-022-02289-2), 2022-04-23

**a**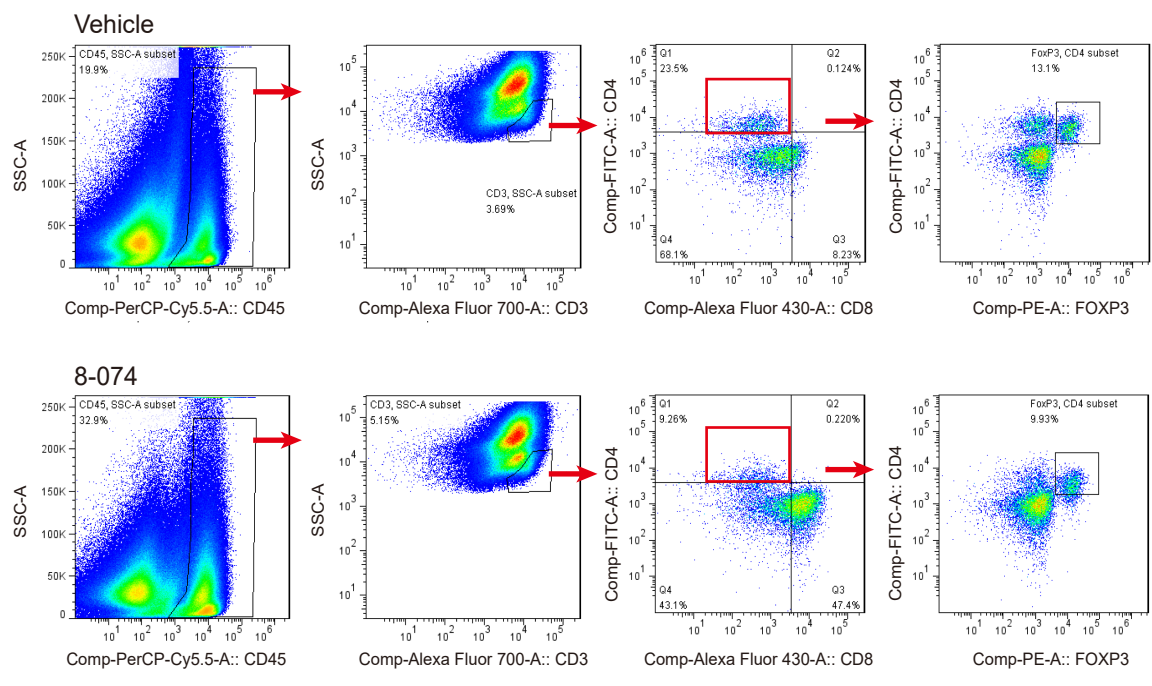**b**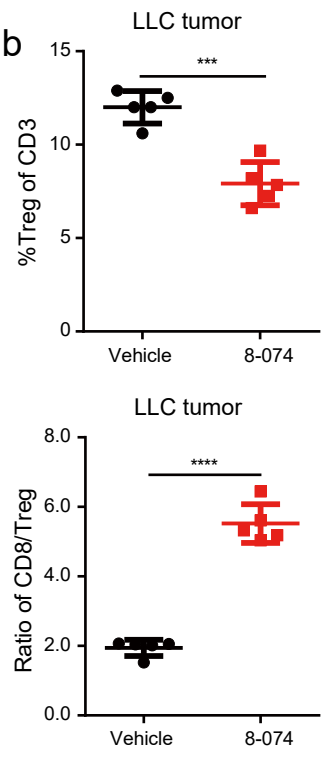**c**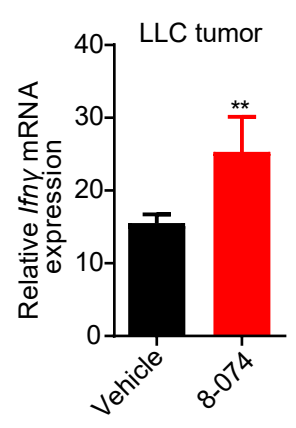**d**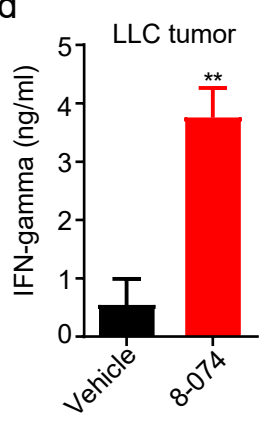

Supplement: MOESM4 [file 20338148]
